# Supplementary material for: Prevalence of Skin Reactions and Self-Reported Allergies in 5 Countries with Their Social Impact Measured through Quality of Life Impairment
Source: Int J Environ Res Public Health. 2021 Apr 23;18(9):4501. doi: 10.3390/ijerph18094501 (PMC8123031; doi:10.3390/ijerph18094501)
Supplement: Supplementary file 1 [file ijerph-18-04501-s001.zip › ijerph-1120285-supplementary.pdf]

## Subset of the survey questionnaire

[S1]: You are:

- 1 A man
- 2 A woman

[S2]: What is your age?

[Q1]: Among the following phototypes, specify the one to which you feel closest?

|   |                                                                                                                                                            |
|---|------------------------------------------------------------------------------------------------------------------------------------------------------------|
| 1 | You have very white skin, blonde or red hair, and blue / green eyes with often freckles. Sunburns are systematic, your skin never tans and always reddens. |
| 2 | You have fair skin, red to brown blonde hair, and light to brown eyes with occasional freckles. Sunburns are common, your skin barely tans or very slowly  |
| 3 | You have medium skin tone, brown hair, and brown eyes. Sunburns are occasional and your skin gradually tans.                                               |
| 4 | You have dark skin tone and brown / black hair and eyes. Sunburn is occasional, especially during intense exposure. Your skin tans well.                   |
| 5 | You have dark brown skin, black hair and eyes. Sunburns are rare, your skin tans a lot.                                                                    |
| 6 | You have black skin, black hair and eyes. Sunburns are very exceptional                                                                                    |

[Q5]: When you were a child, did you have eczema or atopic dermatitis?

- 1 Yes
- 2 No
- 3 Do not know

[Q6]: Do you currently consider your skin?

- 1 Dry
- 2 Normal

- 3 Greasy
- 4 Mixt

[Q9]: Do you currently consider your skin?

- 1 Very sensitive
- 2 Quite sensitive
- 3 A little sensitive
- 4 Not sensitive
- 5 I couldn't say

Q10: Currently, do you experience on your skin, at least once a day, one or more of the following sensations?

- 0 No feeling
- ...
- 100 Maximum felt imaginable
- [Q10r1] Burning
- [Q10r2] tightness
- [Q10r3] Pain
- [Q10r4] Tickling
- [Q10r5] Numbness
- [Q10r6] Hot flushes
- [Q10r7] Pruritus

\*: a presence/absence of a discomfort is defined as a value above 35

Q11: Could you please clarify if you are currently suffering from...?

- 1 Yes
- 2 No
- 3 Do not know
- [Q11r1] Acne
- [Q11r2] Contact eczema
- [Q11r3] Atopic dermatitis
- [Q11r4] Rosacea
- [Q11r5] Psoriasis

|          |                            |
|----------|----------------------------|
| [Q11r6]  | Vitiligo                   |
| [Q11r7]  | Seborrheic dermatitis      |
| [Q11r8]  | A scalp problem or disease |
| [Q11r9]  | Sun allergy                |
| [Q11r10] | Other skin disorder        |

[Q51]: Do you have any allergies?

- 1 Yes
- 2 No

[Q55]: Does your allergy cause your skin to react?

- 1 Yes
- 2 No

Q52\_followup: Do you have or have you had...

- 1 Yes
- 2 No

- [Q52\_followupr1] a food allergy?
- [Q52\_followupr2] a respiratory allergy (rhinitis or asthma)?
- [Q52\_followupr3] a skin allergy?

[Q56]: Has a doctor diagnosed your allergy?

- 1 Yes
- 2 No

[Q56\_1]: was it a...

- 1 general practitioner
- 2 dermatologist
- 3 allergy specialist
- 4 pulmonary specialist
- 5 ENT doctor
- 6 pediatrician

- 7 acupuncturist
- 8 homeopathic doctor
- 9 other specialized physician

[Q57]: Do you know what your allergy is called?

- 1 Yes
- 2 No

Q58: What are the symptoms of your allergy?

- 0 Unchecked
- 1 Checked
  - [Q58r1] asthma
  - [Q58r2] allergic rhinitis (hay fever)
  - [Q58r3] bronchitis with wheezing
  - [Q58r4] eczema/atopic dermatitis
  - [Q58r5] conjunctivitis
  - [Q58r6] edema
  - [Q58r7] other

Q59: Do you know the allergen?

- 0 Unchecked
- 1 Checked
  - [Q59r1] dust mites
  - [Q59r2] cockroaches
  - [Q59r3] pollens
  - [Q59r4] food allergens
  - [Q59r5] dogs, cats, ferrets, other animals
  - [Q59r6] mold
  - [Q59r7] Hymenoptera
  - [Q59r8] latex
  - [Q59r9] other
  - [Q59r10] Je ne sais pas ce qui déclenche mon allergie

[Q64]: Do you have a cough that has lasted for more than 2 weeks?

- 1 Yes
- 2 No

[Q70\_2r1]: In the past 2 weeks, my cough makes me feel tired:

- 7 All the time
- 6 Most of the time
- 5 A good part of the time
- 4 Sometimes
- 3 Few times
- 2 Almost never
- 1 Never

\*: a presence of a quality of life impact is defined as an answer to one of the three values ("All the time", "Most of the time", "A good part of the time")

[Q70\_3r1]: During the past 2 weeks, I feel embarrassed about my cough:

- 7 All the time
- 6 Most of the time
- 5 A good part of the time
- 4 Sometimes
- 3 Few times
- 2 Almost never
- 1 Never

\*: a presence of a quality of life impact is defined as an answer to one of the three values ("All the time", "Most of the time", "A good part of the time")

[Q70\_4r1]: During the past 2 weeks I have felt anxious about my cough:

- 7 All the time
- 6 Most of the time
- 5 A good part of the time
- 4 Sometimes
- 3 Few times

2 Almost never

1 Never

\*: a presence of a quality of life impact is defined as an answer to one of the three values ("All the time", "Most of the time", "A good part of the time")

[Q70\_5r1]: During the past 2 weeks, my cough has interfered with the smooth running of my work or other daily tasks:

7 All the time

6 Most of the time

5 A good part of the time

4 Sometimes

3 Few times

2 Almost never

1 Never

\*: a presence of a quality of life impact is defined as an answer to one of the three values ("All the time", "Most of the time", "A good part of the time")

[Q70\_6r1]: Over the past 2 weeks, I have felt that my cough is preventing me from enjoying my life to the fullest:

7 All the time

6 Most of the time

5 A good part of the time

4 Sometimes

3 Few times

2 Almost never

1 Never

\*: a presence of a quality of life impact is defined as an answer to one of the three values ("All the time", "Most of the time", "A good part of the time")

[Q70\_7r1]: During the past 2 weeks, my cough interfered with my sleep:

7 All the time

6 Most of the time

5 A good part of the time

4 Sometimes

3 Few times

2 Almost never

1 Never

\*: a presence of a quality of life impact is defined as an answer to one of the three values ("All the time", "Most of the time", "A good part of the time")
